# Supplementary material for: Psychische Belastung bei unbegleiteten und begleiteten Flüchtlingen im Kindes- und Jugendalter in Deutschland
Source: Atypon-hosted journal article supplement (doi:10.1024/1422-4917/a000855), 2022-02-28
Supplement: 1422-4917_a000855_esm1.pdf [file 1422-4917_a000855_esm1.pdf]

Elektronisches Supplement 1

*weitere soziodemographische Angaben der Jugendlichen (UMF<sub>J</sub>, BMF<sub>J</sub>)*

|                                        | UMF <sub>J</sub> | BMF <sub>J</sub> |
|----------------------------------------|------------------|------------------|
|                                        | <i>n</i> = 56    | <i>n</i> = 72    |
| <b>Asylverfahren</b>                   |                  |                  |
| Asylantrag gestellt <i>n</i> (%)       | 12 (21.4)        | 6 (8.3)          |
| Asylantrag abgelehnt <i>n</i> (%)      | 2 (3.6)          | 4 (5.6)          |
| Asylantrag bewilligt <i>n</i> (%)      | 8 (14.3)         | 9 (12.5)         |
| weiß nicht <i>n</i> (%)                | 30 (53.6)        | 46 (63.9)        |
| keine Angabe <i>n</i> (%)              | 4 (7.1)          | 7 (9.7)          |
| <b>Wohnort</b>                         |                  |                  |
| Wohnung <i>n</i> (%)                   | 4 (7.1)          | 30 (41.6)        |
| Unterbringungseinrichtung <i>n</i> (%) | 4 (7.1)          | 24 (33.3)        |
| Wohngruppe <i>n</i> (%)                | 47 (83.8)        | 4 (5.6)          |
| andere <i>n</i> (%)                    | 0 (0.0)          | 1 (1.4)          |
| keine Angabe <i>n</i> (%)              | 1 (1.8)          | 13 (18.1)        |
| <b>Zusammenleben*</b>                  |                  |                  |
| Vater <i>n</i> (%)                     | 0 (0.0)          | 54 (75.0)        |
| Mutter <i>n</i> (%)                    | 0 (0.0)          | 65 (90.3)        |
| Geschwister <i>n</i> (%)               | 0 (0.0)          | 63 (87.5)        |

|                                                     | UMF <sub>J</sub>            | BMF <sub>J</sub>            |
|-----------------------------------------------------|-----------------------------|-----------------------------|
|                                                     | <i>n</i> = 56               | <i>n</i> = 72               |
| andere Verwandte <i>n</i> (%)                       | 2 (3.6)                     | 4 (5.6)                     |
| Wohngruppe <i>n</i> (%)                             | 47 (83.9)                   | 4 (5.6)                     |
| Pflegefamilie <i>n</i> (%)                          | 2 (3.6)                     | 0 (0.0)                     |
| alleine lebend <i>n</i> (%)                         | 5 (8.9)                     | 1 (1.4)                     |
| Zusammenleben Geschwister                           |                             |                             |
| Anzahl Brüder <i>M</i> ( <i>SD</i> ); MIN - MAX     | 0.00 (0.0); 0 - 0           | 1.39 (1.15); 0 - 4          |
| Anzahl Schwestern <i>M</i> ( <i>SD</i> ); MIN - MAX | 0.00 (0.0); 0 - 0           | 1.22 (1.10); 0 - 5          |
| keine Angabe <i>n</i> (%)                           | 39 (69.6)                   | 23 (31.9)                   |
| Kontakt zur Familie                                 |                             |                             |
| Kontakt zur Familie <i>n</i> (%)                    | 15 (26.8)                   | 70 (97.2)                   |
| keinen Kontakt zur Familie <i>n</i> (%)             | 4 (7.1)                     | 2 (2.8)                     |
| keine Angabe <i>n</i> (%)                           | 37 (66.1)                   | 0 (0.0)                     |
| Alter (Vater)                                       |                             |                             |
| in Jahren <i>M</i> ( <i>SD</i> ); MIN - MAX         | 50.41 (7.42); 37.72 - 62.38 | 43.14 (6.63); 32.75 - 55.31 |
| keine Angabe <i>n</i> (%)                           | 47 (83.9)                   | 41 (56.9)                   |
| Alter (Mutter)                                      |                             |                             |
| in Jahren <i>M</i> ( <i>SD</i> ); MIN - MAX         | 46.39 (9.52); 35.21 - 62.38 | 40.14 (5.53); 31.56 - 50.55 |
| keine Angabe <i>n</i> (%)                           | 48 (85.7)                   | 40 (55.6)                   |

|                                           | UMF <sub>J</sub> | BMF <sub>J</sub> |
|-------------------------------------------|------------------|------------------|
|                                           | <i>n</i> = 56    | <i>n</i> = 72    |
| <b>Tod Familienmitglied*</b>              |                  |                  |
| Vater <i>n</i> (%)                        | 5 (8.9)          | 2 (2.8)          |
| Mutter <i>n</i> (%)                       | 1 (1.8)          | 3 (4.2)          |
| Geschwister <i>n</i> (%)                  | 6 (10.7)         | 7 (9.7)          |
| keine Angabe <i>n</i> (%)                 | 39 (69.6)        | 28 (38.9)        |
| <b>Familienangehörige in Deutschland*</b> |                  |                  |
| Vater <i>n</i> (%)                        | 0 (0.0)          | 35 (48.6)        |
| Mutter <i>n</i> (%)                       | 0 (0.0)          | 40 (55.6)        |
| Geschwister <i>n</i> (%)                  | 5 (8.9)          | 8 (11.1)         |
| alle Geschwister <i>n</i> (%)             | 1 (1.8)          | 34 (47.2)        |
| Verwandte <i>n</i> (%)                    | 7 (12.5)         | 26 (36.1)        |
| keine Angabe <i>n</i> (%)                 | 39 (69.6)        | 27 (37.5)        |
| <b>Schulform (Jugendlicher)</b>           |                  |                  |
| Grundschule <i>n</i> (%)                  | 0 (0.0)          | 3 (4.2)          |
| Hauptschule <i>n</i> (%)                  | 6 (10.7)         | 23 (31.9)        |
| Realschule <i>n</i> (%)                   | 5 (8.9)          | 7 (9.7)          |
| Gymnasium <i>n</i> (%)                    | 1 (1.8)          | 4 (5.6)          |
| andere <i>n</i> (%)                       | 1 (1.8)          | 1 (1.4)          |

|                                             | UMF <sub>J</sub>    | BMF <sub>J</sub>    |
|---------------------------------------------|---------------------|---------------------|
|                                             | <i>n</i> = 56       | <i>n</i> = 72       |
| aktuell kein Schulbesuch <i>n</i> (%)       | 2 (3.6)             | 4 (5.6)             |
| Schulbildung beendet <i>n</i> (%)           | 2 (3.6)             | 3 (4.2)             |
| keine Angabe <i>n</i> (%)                   | 39 (69.6)           | 27 (37.5)           |
| Schulbesuch (Vater)                         |                     |                     |
| in Jahren <i>M</i> ( <i>SD</i> ); MIN - MAX | 5.56 (5.52); 0 - 13 | 7.12 (4.20); 0 - 14 |
| keine Angabe <i>n</i> (%)                   | 44 (78.6)           | 24 (33.3)           |
| Studium (Vater)                             |                     |                     |
| ja <i>n</i> (%)                             | 3 (5.4)             | 10 (13.9)           |
| nein <i>n</i> (%)                           | 9 (16.1)            | 38 (52.8)           |
| keine Angabe <i>n</i> (%)                   | 44 (78.6)           | 24 (33.3)           |
| Schulbesuch (Mutter)                        |                     |                     |
| in Jahren <i>M</i> ( <i>SD</i> ); MIN - MAX | 4.31 (5.02); 0 - 13 | 6.55 (4.62); 0 - 13 |
| keine Angabe <i>n</i> (%)                   | 43 (76.8)           | 25 (34.7)           |
| Studium (Mutter)                            |                     |                     |
| ja <i>n</i> (%)                             | 1 (1.8)             | 12 (16.7)           |
| nein <i>n</i> (%)                           | 10 (17.9)           | 35 (48.6)           |
| keine Angabe <i>n</i> (%)                   | 45 (80.4)           | 25 (34.7)           |

Anmerkung. \*Mehrfachnennungen möglich.
