# Supplementary material for: Psychische Belastung bei unbegleiteten und begleiteten Flüchtlingen im Kindes- und Jugendalter in Deutschland
Source: Atypon-hosted journal article supplement (doi:10.1024/1422-4917/a000855), 2022-02-28
Supplement: 1422-4917_a000855_esm2.pdf [file 1422-4917_a000855_esm2.pdf]

Elektronisches Supplement 2

weitere soziodemographische Angaben der Kinder (BMF<sub>K</sub>)

|                                                     | BMF <sub>K</sub>            |
|-----------------------------------------------------|-----------------------------|
|                                                     | <i>n</i> = 42               |
| <hr/>                                               |                             |
| Asylverfahren                                       |                             |
| Asylantrag gestellt <i>n</i> (%)                    | 4 (9.5)                     |
| Asylantrag abgelehnt <i>n</i> (%)                   | 1 (2.4)                     |
| Asylantrag bewilligt <i>n</i> (%)                   | 6 (14.3)                    |
| keine Angabe <i>n</i> (%)                           | 31 (73.8)                   |
| Wohnort                                             |                             |
| Wohnung <i>n</i> (%)                                | 23 (54.8)                   |
| Unterbringungseinrichtung <i>n</i> (%)              | 16 (38.1)                   |
| keine Angabe <i>n</i> (%)                           | 3 (7.1)                     |
| Zusammenleben Bezugsperson                          |                             |
| Vater und Mutter <i>n</i> (%)                       | 33 (78.6)                   |
| Vater <i>n</i> (%)                                  | 2 (4.8)                     |
| Mutter <i>n</i> (%)                                 | 7 (16.7)                    |
| Zusammenleben Geschwister                           |                             |
| Anzahl Brüder <i>M</i> ( <i>SD</i> ); MIN - MAX     | 1.00 (0.95); 0 - 3          |
| Anzahl Schwestern <i>M</i> ( <i>SD</i> ); MIN - MAX | 1.41 (1.13); 0 - 4          |
| keine Angabe <i>n</i> (%)                           | 8 (19.0)                    |
| Alter (Vater)                                       |                             |
| in Jahren <i>M</i> ( <i>SD</i> ); MIN - MAX         | 37.51 (8.28); 20.66 - 53.71 |
| keine Angabe <i>n</i> (%)                           | 10 (23.8)                   |
| Alter (Mutter)                                      |                             |
| in Jahren <i>M</i> ( <i>SD</i> ); MIN - MAX         | 32.45 (4.96); 23.39 - 44.98 |
| keine Angabe <i>n</i> (%)                           | 5 (11.9)                    |
| Tod Familienmitglied*                               |                             |
| Vater <i>n</i> (%)                                  | 0 (0.0)                     |
| Mutter <i>n</i> (%)                                 | 0 (0.0)                     |
| Geschwister <i>n</i> (%)                            | 3 (7.1)                     |

|                                             | BMF <sub>K</sub>    |
|---------------------------------------------|---------------------|
|                                             | <i>n</i> = 42       |
| keine Angabe <i>n</i> (%)                   | 14 (33.3)           |
| <b>Familienangehörige in Deutschland*</b>   |                     |
| Vater <i>n</i> (%)                          | 26 (61.9)           |
| Mutter <i>n</i> (%)                         | 27 (64.3)           |
| Geschwister <i>n</i> (%)                    | 1 (2.4)             |
| alle Geschwister <i>n</i> (%)               | 27 (64.3)           |
| Verwandte <i>n</i> (%)                      | 13 (31.0)           |
| keine Angabe <i>n</i> (%)                   | 14 (33.3)           |
| <b>Schulform (Kind)</b>                     |                     |
| Grundschule <i>n</i> (%)                    | 31 (73.8)           |
| noch nicht schulfähig <i>n</i> (%)          | 2 (4.8)             |
| aktuell kein Schulbesuch <i>n</i> (%)       | 1 (2.4)             |
| keine Angabe <i>n</i> (%)                   | 8 (19.0)            |
| <b>Schulbesuch (Vater)</b>                  |                     |
| in Jahren <i>M</i> ( <i>SD</i> ); MIN - MAX | 7.27 (3.91); 0 - 14 |
| keine Angabe <i>n</i> (%)                   | 12 (28.6)           |
| <b>Studium (Vater)</b>                      |                     |
| ja <i>n</i> (%)                             | 3 (7.1)             |
| nein <i>n</i> (%)                           | 27 (64.3)           |
| keine Angabe <i>n</i> (%)                   | 12 (28.6)           |
| <b>Schulbesuch (Mutter)</b>                 |                     |
| in Jahren <i>M</i> ( <i>SD</i> ); MIN - MAX | 7.29 (5.08); 0 - 14 |
| keine Angabe <i>n</i> (%)                   | 8 (19.0)            |
| <b>Studium (Mutter)</b>                     |                     |
| ja <i>n</i> (%)                             | 8 (19.0)            |
| nein <i>n</i> (%)                           | 26 (62.0)           |
| keine Angabe <i>n</i> (%)                   | 8 (19.0)            |

*Anmerkung.* \*Mehrfachnennungen möglich.
