# Supplementary material for: Psychische Belastung bei unbegleiteten und begleiteten Flüchtlingen im Kindes- und Jugendalter in Deutschland
Source: Atypon-hosted journal article supplement (doi:10.1024/1422-4917/a000855), 2022-02-28
Supplement: 1422-4917_a000855_esm3.pdf [file 1422-4917_a000855_esm3.pdf]

Elektronisches Supplement 3

Mittelwerte und Standardabweichungen der Skalenvariablen der Teilnehmenden des Feldzugangs und der Teilnehmenden des klinisch-pädagogischen Rekrutierungszugangs der Stichprobe der Jugendlichen ( $UMF_J$ ,  $BMF_J$ ) und der Kinder ( $BMF_K$ )

|             | $UMF_J^1$ |       | $UMF_J^2$ |       | $BMF_J^1$ |       | $BMF_J^2$ |       | $BMF_K^1$ |       | $BMF_K^2$ |      |       |      |
|-------------|-----------|-------|-----------|-------|-----------|-------|-----------|-------|-----------|-------|-----------|------|-------|------|
|             | $n = 34$  |       | $n = 22$  |       | $n = 61$  |       | $n = 11$  |       | $n$       |       | $n$       |      |       |      |
|             | $M$       | $SD$  | $M$       | $SD$ |       |      |
| SDQ-EP      | 5.32      | 2.33  | 6.18      | 2.42  | 4.02      | 3.02  | 5.09      | 3.27  | 37        | 3.70  | 2.70      | 4    | 5.50  | 0.58 |
| SDQ-HYP     | 3.29      | 1.93  | 3.82      | 2.04  | 3.67      | 2.55  | 4.82      | 1.94  | 38        | 3.92  | 2.50      | 4    | 6.00  | 1.41 |
| SDQ-VA      | 2.06      | 1.56  | 2.32      | 1.39  | 2.11      | 1.86  | 2.73      | 2.05  | 38        | 2.66  | 2.02      | 4    | 2.75  | 1.50 |
| SDQ-PG      | 3.41      | 2.06  | 3.45      | 1.97  | 2.51      | 1.92  | 3.09      | 1.92  | 38        | 2.68  | 2.04      | 4    | 4.50  | 2.52 |
| SDQ-PRO     | 8.91      | 1.83  | 9.05      | 1.40  | 8.64      | 1.55  | 8.36      | 1.75  | 38        | 8.45  | 1.69      | 4    | 7.75  | 1.71 |
| SDQ-GP      | 14.32     | 5.42  | 15.77     | 5.32  | 12.54     | 6.64  | 16.64     | 8.08  | 37        | 12.95 | 7.28      | 4    | 18.75 | 3.59 |
| SLE-Gesamt  | 6.41      | 2.32  | 7.77      | 1.60  | 4.36      | 2.53  | 4.82      | 2.89  | 37        | 3.76  | 2.34      | 4    | 3.50  | 1.92 |
| UCLA-B      | 6.71      | 4.34  | 12.05     | 5.94  | 4.93      | 4.64  | 9.09      | 6.53  | 31        | 4.45  | 5.60      | 4    | 5.75  | 3.78 |
| UCLA-C      | 3.03      | 1.75  | 4.36      | 1.81  | 2.49      | 2.34  | 3.55      | 1.44  | 31        | 1.68  | 2.09      | 2    | 3.50  | 4.95 |
| UCLA-D      | 10.62     | 5.57  | 16.59     | 6.39  | 8.74      | 6.40  | 11.45     | 5.05  | 33        | 7.42  | 7.03      | 2    | 7.00  | 2.83 |
| UCLA-E      | 7.06      | 4.04  | 10.41     | 5.43  | 6.62      | 5.12  | 8.45      | 5.80  | 36        | 6.03  | 5.22      | 3    | 10.00 | 2.65 |
| UCLA-Gesamt | 27.76     | 14.75 | 41.77     | 14.97 | 22.77     | 16.40 | 30.82     | 14.16 | 25        | 13.16 | 12.93     | 2    | 22.00 | 4.24 |

Anmerkungen. Die Werte der Jugendlichen ( $UMF_J$ ,  $BMF_J$ ) sind imputierte Werte. Für die Kinder ( $BMF_K$ ) wurden die nicht imputierten Daten abgetragen. Aufgrund des geringen Stichprobenumfangs wurden die Daten der Kinder ( $BMF_K$ ) nicht interpretiert. <sup>1</sup> Rekrutierung über Feldzugang, <sup>2</sup> Rekrutierung über klinisch-pädagogischen Zugang; SDQ-EP = SDQ-Emotionale Probleme, SDQ-HYP = SDQ-Hyperaktivität, SDQ-VA = SDQ-Verhaltensauffälligkeiten, SDQ-PG = SDQ-Probleme mit Gleichaltrigen, SDQ-PRO = SDQ-Prosoziales Verhalten, SDQ-Gesamt = SDQ-Gesamtskala, SLE-Gesamt = SLE-Gesamtskala, UCLA-B = UCLA PTSD-RI-5 Skala B, UCLA-C = UCLA PTSD-RI-5 Skala C, UCLA-D = UCLA PTSD-RI-5 Skala D, UCLA-E = UCLA PTSD-RI-5 Skala E, UCLA-Gesamt = UCLA PTSD-RI-5-Gesamtskala.
