# Supplementary material for: Psychische Belastung bei unbegleiteten und begleiteten Flüchtlingen im Kindes- und Jugendalter in Deutschland
Source: Atypon-hosted journal article supplement (doi:10.1024/1422-4917/a000855), 2022-02-28
Supplement: 1422-4917_a000855_esm4.pdf [file 1422-4917_a000855_esm4.pdf]

Elektronisches Supplement 4

*Korrelationen der Skalenvariablen der Stichprobe der Jugendlichen (UMF<sub>J</sub>, BMF<sub>J</sub>)*

| Variablen      | 1 | 2      | 3      | 4      | 5       | 6       | 7      | 8      | 9      | 10     | 11     | 12     |
|----------------|---|--------|--------|--------|---------|---------|--------|--------|--------|--------|--------|--------|
| 1 SDQ-EP       | - | .42*** | .26**  | .38*** | -.14    | .81***  | .47*** | .67*** | .42*** | .60*** | .61*** | .68*** |
| 2 SDQ-HYP      |   | -      | .35*** | .20*   | -.36*** | .70***  | .21*   | .38*** | .22*   | .41*** | .53*** | .44*** |
| 3 SDQ-VA       |   |        | -      | .24**  | -.40*** | .59***  | .20*   | .14    | .14    | .19*   | .34*** | .24**  |
| 4 SDQ-PG       |   |        |        | -      | -.27**  | .61***  | .26**  | .34*** | .31*** | .38*** | .36*** | .41*** |
| 5 SDQ-PRO      |   |        |        |        | -       | -.37*** | .06    | -.04   | -.01   | -.09   | -.27** | -.11   |
| 6 SDQ-Gesamt   |   |        |        |        |         | -       | .42*** | .59*** | .40*** | .58*** | .66*** | .66*** |
| 7 SLE-Gesamt   |   |        |        |        |         |         | -      | .54*** | .40*** | .50*** | .38*** | .53*** |
| 8 UCLA-B       |   |        |        |        |         |         |        | -      | .60*** | .72*** | .68*** | .87*** |
| 9 UCLA-C       |   |        |        |        |         |         |        |        | -      | .61*** | .57*** | .74*** |
| 10 UCLA-D      |   |        |        |        |         |         |        |        |        | -      | .73*** | .91*** |
| 11 UCLA-E      |   |        |        |        |         |         |        |        |        |        | -      | .86*** |
| 12 UCLA-Gesamt |   |        |        |        |         |         |        |        |        |        |        | -      |

*Anmerkungen.* Die Werte wurden imputierten Datensätzen entnommen. SDQ-EP = SDQ-Emotionale Probleme, SDQ-HYP = SDQ-Hyperaktivität, SDQ-VA = SDQ-Verhaltensauffälligkeiten, SDQ-PG = SDQ-Probleme mit Gleichaltrigen, SDQ-PRO = SDQ-Prosoziales Verhalten, SDQ-Gesamt = SDQ-Gesamtskala, SLE-Gesamt = SLE-Gesamtskala, UCLA-B = UCLA PTSD-RI-5 Skala B, UCLA-C = UCLA PTSD-RI-5 Skala C, UCLA-D = UCLA PTSD-RI-5 Skala D, UCLA-E = UCLA PTSD-RI-5 Skala E, UCLA-Gesamt = UCLA PTSD-RI-5 Gesamtskala; Pearson Korrelationen;  $n = 128$ ; \* $p < .05$ , \*\* $p < .01$ , \*\*\* $p < .001$ .
